# Supplementary material for: Freeze-Dried Mesenchymal Stem Cell-Secretome Pharmaceuticalization: Optimization of Formulation and Manufacturing Process Robustness
Source: MDPI journal article supplement (doi:10.3390/pharmaceutics13081129), 2021-07-23
Supplement: s1 [file s1]

# Supplementary material: Freeze-Dried Mesenchymal Stem Cell-Secretome Pharmaceuticalization: Optimization of Formulation and Manufacturing Process Robustness

Michela Mocchi, Elia Bari, Giorgio Marrubini, Andrea Foglio Bonda, Sara Perteghella, Fulvio Tartara, Fabio Cofano, Giuseppe di Perna, Lorella Giovannelli, Delia Mandracchia, Marzio Sorlini, Diego Garbossa, Maria Luisa Torre and Lorena Segale

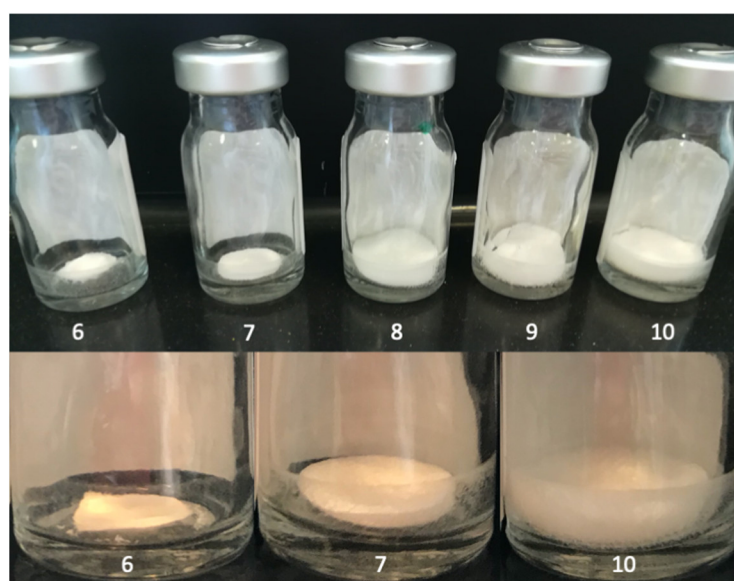

**Figure S1.** Cake aspect of freeze-dried Lyosecretome (numbers identify the formulation as detailed in Table 1).

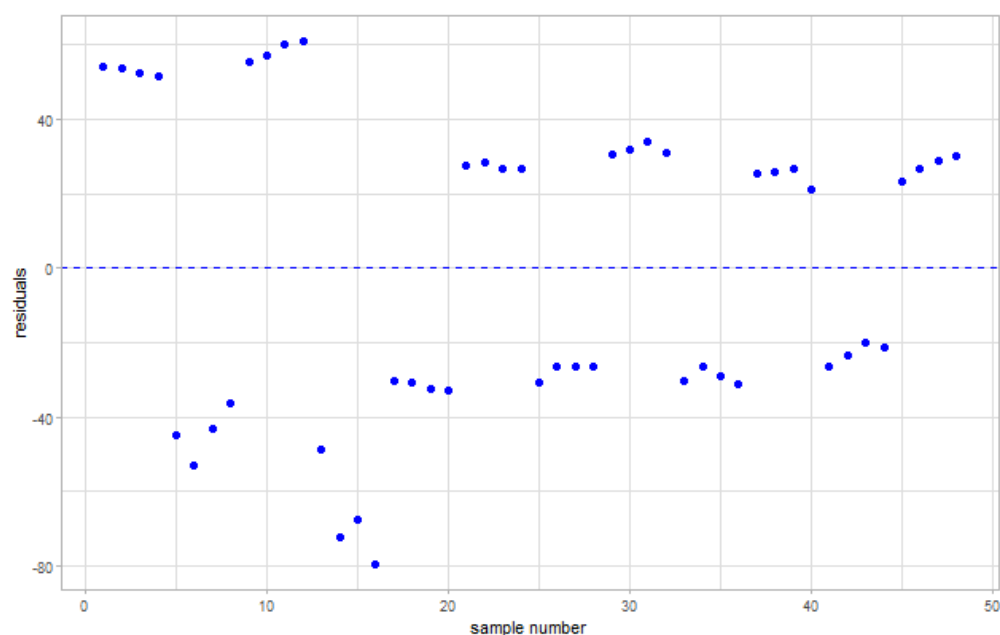

**Figure S2.** The plot of residuals for the model  $Y_p$ .

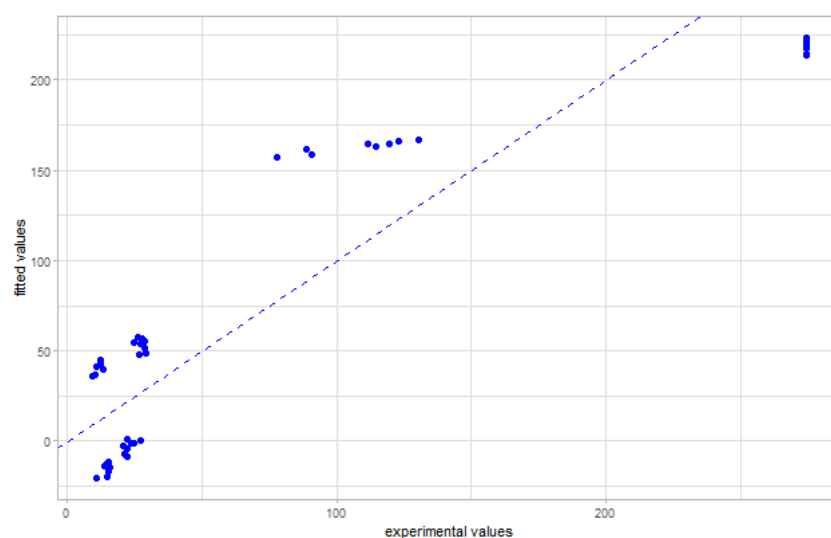

**Figure S3.** Fitting for the model  $Y_P$ .

**Table S3.** The predictive ability for the model  $Y_P$ . NA = Not applicable.

| Test | Secretome batch | Lyophilization | Concentration | Mannitol (%) | Experimental $Y_P$ | Calculated $Y_P$ | Relative error % |
|------|-----------------|----------------|---------------|--------------|--------------------|------------------|------------------|
| 4    | 1               | Pre            | 0.5           | 65           | 274.76             | 221.46           | 19               |
| 10   | 1               | Post           | 0.5           | 65           | 116.48             | 165.11           | -42              |
| 16   | 1               | Pre            | 1.5           | 65           | 274.76             | 216.02           | 21               |
| 22   | 1               | Post           | 1.5           | 65           | 92.23              | 159.66           | -73              |
| 4    | 2               | Pre            | 0.5           | 65           | 13.19              | 43.45            | -229             |
| 10   | 2               | Post           | 0.5           | 65           | 14.89              | -12.91           | 187              |
| 16   | 2               | Pre            | 1.5           | 65           | 12.61              | 38.00            | -201             |
| 22   | 2               | Post           | 1.5           | 65           | 14.58              | -18.35           | 226              |
| 4    | 3               | Pre            | 0.5           | 65           | 25.93              | 55.68            | -115             |
| 10   | 3               | Post           | 0.5           | 65           | 23.28              | -0.67            | NA               |
| 16   | 3               | Pre            | 1.5           | 65           | 27.09              | 50.24            | -85              |
| 22   | 3               | Post           | 1.5           | 65           | 21.05              | -6.12            | 129              |

**Table S4.** The predictive ability for the model  $Y_L$ . NA = Not applicable.

| Test | Secretome batch | Lyophilization | Concentration | Mannitol (%) | Experimental $Y_L$ | Calculated $Y_L$ | Relative error % |
|------|-----------------|----------------|---------------|--------------|--------------------|------------------|------------------|
| 4    | 1               | Pre            | 0.5           | 65           | 14.56              | 13.85            | 5                |
| 10   | 1               | Post           | 0.5           | 65           | 10.32              | 12.72            | -23              |
| 16   | 1               | Pre            | 1.5           | 65           | 14.56              | 14.18            | 3                |
| 22   | 1               | Post           | 1.5           | 65           | 14.49              | 12.98            | 10               |
| 4    | 2               | Pre            | 0.5           | 65           | 1.20               | 1.34             | -12              |
| 10   | 2               | Post           | 0.5           | 65           | 0.00               | 0.22             | 100              |
| 16   | 2               | Pre            | 1.5           | 65           | 0.73               | 1.68             | -130             |
| 22   | 2               | Post           | 1.5           | 65           | 0.48               | 0.48             | -1               |
| 4    | 3               | Pre            | 0.5           | 65           | 1.92               | 2.25             | -17              |
| 10   | 3               | Post           | 0.5           | 65           | 1.87               | 1.13             | 40               |
| 16   | 3               | Pre            | 1.5           | 65           | 1.68               | 2.59             | -54              |
| 22   | 3               | Post           | 1.5           | 65           | 1.15               | 1.41             | -23              |

**Table S5.** Experimental plan (data in black), experimental matrix (in blue) and responses (in green field) studied for the analysis of the data of the diameter of the lyophilizate particles.

| Test | Secretome batch | C   | M   | S1 | S2 | C  | M    | Mode   | d <sub>10</sub> | d <sub>90</sub> |
|------|-----------------|-----|-----|----|----|----|------|--------|-----------------|-----------------|
| 8    | 1               | 0.5 | 25  | 1  | 0  | -1 | -1.0 | 92.07  | 74.83           | 199             |
| 9    | 1               | 0.5 | 45  | 1  | 0  | -1 | -0.5 | 117    | 105.6           | 294             |
| 10   | 1               | 0.5 | 65  | 1  | 0  | -1 | 0.0  | 97.1   | 89.4            | 195.2           |
| 11   | 1               | 0.5 | 85  | 1  | 0  | -1 | 0.6  | 93.20  | 86.2            | 263.3           |
| 12   | 1               | 0.5 | 100 | 1  | 0  | -1 | 1.0  | 98.50  | 92.5            | 341.2           |
| 20   | 1               | 1.5 | 25  | 1  | 0  | 1  | -1.0 | 88.1   | 79.3            | 238             |
| 21   | 1               | 1.5 | 45  | 1  | 0  | 1  | -0.5 | 96.3   | 85.9            | 240.6           |
| 22   | 1               | 1.5 | 65  | 1  | 0  | 1  | 0.0  | 96.5   | 84.5            | 259.4           |
| 23   | 1               | 1.5 | 85  | 1  | 0  | 1  | 0.6  | 130.5  | 124.4           | 359.3           |
| 24   | 1               | 1.5 | 100 | 1  | 0  | 1  | 1.0  | 153.8  | 129.5           | 487             |
| 8    | 2               | 0.5 | 25  | 0  | 1  | -1 | -1.0 | 110.6  | 96.55           | 266.05          |
| 9    | 2               | 0.5 | 45  | 0  | 1  | -1 | -0.5 | 102.2  | 98.4            | 280             |
| 10   | 2               | 0.5 | 65  | 0  | 1  | -1 | 0.0  | 105.5  | 82.6            | 219.1           |
| 11   | 2               | 0.5 | 85  | 0  | 1  | -1 | 0.6  | 84.90  | 81.4            | 232.5           |
| 12   | 2               | 0.5 | 100 | 0  | 1  | -1 | 1.0  | 100.20 | 89.2            | 326.6           |
| 20   | 2               | 1.5 | 25  | 0  | 1  | 1  | -1.0 | 87.3   | 83.4            | 269.9           |
| 21   | 2               | 1.5 | 45  | 0  | 1  | 1  | -0.5 | 96.4   | 91.1            | 274.4           |
| 22   | 2               | 1.5 | 65  | 0  | 1  | 1  | 0.0  | 75.8   | 71.2            | 174.5           |
| 23   | 2               | 1.5 | 85  | 0  | 1  | 1  | 0.6  | 126.9  | 82.4            | 189.6           |
| 24   | 2               | 1.5 | 100 | 0  | 1  | 1  | 1.0  | 93.4   | 85.7            | 231.1           |
| 8    | 3               | 0.5 | 25  | 0  | 0  | -1 | -1.0 | 108.9  | 102             | 316.3           |
| 9    | 3               | 0.5 | 45  | 0  | 0  | -1 | -0.5 | 119.6  | 108.8           | 248             |
| 10   | 3               | 0.5 | 65  | 0  | 0  | -1 | 0.0  | 75.8   | 65.55           | 166.65          |
| 11   | 3               | 0.5 | 85  | 0  | 0  | -1 | 0.6  | 91.50  | 86.2            | 276.8           |
| 12   | 3               | 0.5 | 100 | 0  | 0  | -1 | 1.0  | 95.10  | 87.2            | 286.1           |
| 20   | 3               | 1.5 | 25  | 0  | 0  | 1  | -1.0 | 100.3  | 89.4            | 328.1           |
| 21   | 3               | 1.5 | 45  | 0  | 0  | 1  | -0.5 | 102.1  | 89.7            | 254.3           |
| 22   | 3               | 1.5 | 65  | 0  | 0  | 1  | 0.0  | 96.2   | 85              | 246.4           |
| 23   | 3               | 1.5 | 85  | 0  | 0  | 1  | 0.6  | 112.4  | 101.1           | 258.6           |
| 24   | 3               | 1.5 | 100 | 0  | 0  | 1  | 1.0  | 106.8  | 90              | 281.9           |
